# Supplementary material for: Disentangling the Origins of Cultivated Sweet Potato (Ipomoea batatas (L.) Lam.)
Source: PLOS journal article supplement (doi:10.1371/journal.pone.0062707), 2013-05-27
Supplement: S4 (10.1371/journal.pone.0062707.s004) [file journal.pone.0062707.s004]

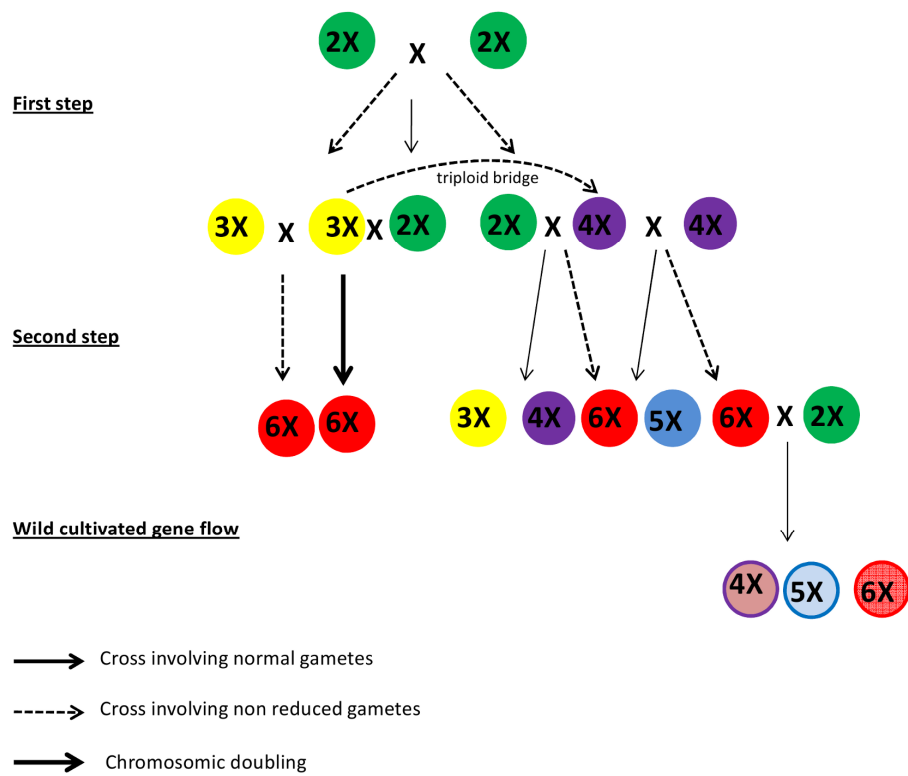

*Triploid bridge: formation of triploids is often considered to mediate the autopolyploidization process. It is also possible that tetraploids, as well as hexaploids, were formed without the intermediate formation of triploids, simply via successive crosses involving 2n gametes (right part of the graph).*
