# Supplementary material for: Disentangling the Origins of Cultivated Sweet Potato (Ipomoea batatas (L.) Lam.)
Source: PLoS One. 2013 May 27;8(5):e62707. doi: 10.1371/journal.pone.0062707 (PMC3664560; doi:10.1371/journal.pone.0062707)
Supplement: Table S1 — Passport data of the accessions used in the present study. Taxa name, ploidy level, ex situ collection names (CIP, NIAS, USDA), geographical origin data and GenBank. (XLS) [file pone.0062707.s005.xls]

## Sheet: S1
Sample number	species	collection	ploidy level	Country	IGS GenBank accessions No	ITS GenBank accessions No	haplo_ITS	haplo_IGS	cp SSRs group	DAPC cluster	Latitude	Longitude
400009	I. batatas	CIP	6X	Mexico					1	2	ND	ND
400010	I. batatas	CIP	6X	Mexico	KC621636	KC621810	10	12	2	2	ND	ND
400024	I. batatas	CIP	6X	Saint Vincent	KC621637	KC621807	7	12	2	2	13.264	-61.1943
400025	I. batatas	CIP	6X	Saint Vincent					1	1	10.33	-67.66
400031	I. batatas	CIP	6X	Puerto Rico					1	1	12.36	-86.66
400032	I. batatas	CIP	6X	Puerto Rico					2	1	12.33	-86.45
400034	I. batatas	CIP	6X	Dominican Republic					2	2	ND	ND
400040	I. batatas	CIP	6X	Jamaica					2	2	18	-77.08
400044	I. batatas	CIP	6X	Argentina					1	1	ND	ND
400166	I. batatas	CIP	6X	Bolivia					1	1	10.66	-74.96
400180	I. batatas	CIP	6X	Bolivia	KC621638			19	1	1	10.66	-74.96
400377	I. batatas	CIP	6X	Colombia					2	3	4.33	-75.61
400382	I. batatas	CIP	6X	Colombia						3	4.33	-75.61
400397	I. batatas	CIP	6X	Colombia					1	1	14.31	-90.43
400420	I. batatas	CIP	6X	Colombia					1	1	10.8252	-85.6384
400421	I. batatas	CIP	6X	Colombia						1	10.8252	-85.6384
400436	I. batatas	CIP	6X	Colombia	KC621639	KC621806	6	19	1	1	10.8252	-85.6384
400443	I. batatas	CIP	6X	Colombia					2	1	10.8252	-85.6384
400458	I. batatas	CIP	6X	Colombia					1	1	10.25	-74.08
400459	I. batatas	CIP	6X	Colombia					1	1	10.8717	-85.76
400493	I. batatas	CIP	6X	Colombia	KC621640	KC621812	12	12	2	3	3.66	-76.5
400509	I. batatas	CIP	6X	Colombia					1	2	10.41	-73.75
400512	I. batatas	CIP	6X	Colombia	KC621641			12	2	2	8.35	-73.51
400515	I. batatas	CIP	6X	Colombia					2	1	10.25	-74.08
400517	I. batatas	CIP	6X	Colombia					1	2	8.06	-73
400518	I. batatas	CIP	6X	Colombia					1	2	8.33	-73.43
400551	I. batatas	CIP	6X	Costa Rica					1	2	10.4176	-84.4308
400578	I. batatas	CIP	6X	Cuba					2	1	12.36	-86.66
400584	I. batatas	CIP	6X	Cuba					1	2	ND	ND
400602	I. batatas	CIP	6X	Cuba					2	2	ND	ND
400608	I. batatas	CIP	6X	Cuba					1	2	ND	ND
400786	I. batatas	CIP	6X	Dominican Republic					1	2	ND	ND
400815	I. batatas	CIP	6X	Dominican Republic						2	18.66	-70.75
400817	I. batatas	CIP	6X	Dominican Republic					1	2	18.66	-70.75
400825	I. batatas	CIP	6X	Dominican Republic					2	2	19.6	-70.5
400828	I. batatas	CIP	6X	Dominican Republic					1	2	19.56	-70.53
400830	I. batatas	CIP	6X	Dominican Republic					1	2	19.16	-70.5
400865	I. batatas	CIP	6X	Dominican Republic					2	2	-0.83	-77.5
400904	I. batatas	CIP	6X	Ecuador					2	1	12.08	-85.33
400908	I. batatas	CIP	6X	Ecuador	KC621642			19	1	1	14.25	-90.7
400929	I. batatas	CIP	6X	Ecuador					2	1	12.15	-86.26
400941	I. batatas	CIP	6X	Ecuador					1	1	14.46	-90.63
400954	I. batatas	CIP	6X	Ecuador					1	1	14.31	-90.43
400955	I. batatas	CIP	6X	Ecuador					1	1	15.73	-89.16
400962	I. batatas	CIP	6X	Ecuador					1	1	15.73	-89.16
400966	I. batatas	CIP	6X	Ecuador					1	1	14.66	-92.16
400968	I. batatas	CIP	6X	Ecuador	KC621643			19	1	1	14.21	-90.33
400982	I. batatas	CIP	6X	Ecuador					1	1	14.25	-90.7
400987	I. batatas	CIP	6X	Ecuador					2	2	-0.16	-78.33
401005	I. batatas	CIP	6X	Ecuador					1	3	4.58	-75.66
401017	I. batatas	CIP	6X	Ecuador	KC621644			20	1	1	14.3	-90.96
401021	I. batatas	CIP	6X	Ecuador	KC621645	KC621863	40	19	1	1	14.3	-90.96
401024	I. batatas	CIP	6X	Ecuador					1	1	12.08	-85.33
401028	I. batatas	CIP	6X	Ecuador					2	2	-2.75	-78.66
401032	I. batatas	CIP	6X	Ecuador					2	2	-3.16	-79.08
401042	I. batatas	CIP	6X	Ecuador					1	1	12.53	-85.76
401055	I. batatas	CIP	6X	Guatemala					1	1	12.15	-86.26
401079	I. batatas	CIP	6X	Guatemala	KC621646	KC621813	13	12	2	3	4.58	-75.66
401083	I. batatas	CIP	6X	Guatemala	KC621647			12	2	3	3.46065	-76.5239
401094	I. batatas	CIP	6X	Guatemala	KC621648	KC621811	11	12	2	2	16.95	-89.48
401101	I. batatas	CIP	6X	Guatemala					2	2	15.46	-88.81
401114	I. batatas	CIP	6X	Guatemala					1	2	15.31	-89.9
401119	I. batatas	CIP	6X	Guatemala					1	1	12.81	-86.58
401136	I. batatas	CIP	6X	Guatemala					2	3	3.46065	-76.5239
401170	I. batatas	CIP	6X	Jamaica					2	2	18.33	-77.16
401172	I. batatas	CIP	6X	Jamaica					2	2	18.58	-77.25
401183	I. batatas	CIP	6X	Jamaica	KC621649			12	2	2	18.08	-77.16
401200	I. batatas	CIP	6X	Jamaica					1	2	17.83	-77.03
401207	I. batatas	CIP	6X	Mexico					2	1	12.15	-86.26
401208	I. batatas	CIP	6X	Mexico					2	1	12.81	-86.58
401210	I. batatas	CIP	6X	Mexico						2	ND	ND
401213	I. batatas	CIP	6X	Mexico					2	2	19.0666	-96.9833
401214	I. batatas	CIP	6X	Mexico					2	2	ND	ND
401215	I. batatas	CIP	6X	Mexico					2	2	21.3166	-97.5
401236	I. batatas	CIP	6X	Panama					1	3	-3.33	-79.91
401238	I. batatas	CIP	6X	Panama					2	1	12.4667	-84.3833
401248	I. batatas	CIP	6X	Panama					2	1	11.36	-74.2
401251	I. batatas	CIP	6X	Panama					2	3	ND	ND
401259	I. batatas	CIP	6X	Panama					2	3	22.25	-80
401264	I. batatas	CIP	6X	Panama					2	3	22.25	-80
401267	I. batatas	CIP	6X	Panama					2	3	ND	ND
401269	I. batatas	CIP	6X	Panama	KC621650			12	2	3	0.933797	-79.6674
401272	I. batatas	CIP	6X	Panama	KC621651			12	2	3	-3.33	-79.91
401277	I. batatas	CIP	6X	Panama					1	2	9.13	-79.03
401280	I. batatas	CIP	6X	Panama					1	1	13.35	-86.43
401378	I. batatas	CIP	6X	Venezuela					2	2	9.66	-68.66
401381	I. batatas	CIP	6X	Venezuela					2	2	9.75	-69.66
401392	I. batatas	CIP	6X	Venezuela					2	2	9.16	-70.16
401394	I. batatas	CIP	6X	Venezuela	KC621652	KC621809	9	12	2	3	ND	ND
401396	I. batatas	CIP	6X	Venezuela					2	2	8.66	-71.75
401399	I. batatas	CIP	6X	Venezuela					1	2	8.33	-71.83
401403	I. batatas	CIP	6X	Venezuela					2	3	ND	ND
401430	I. batatas	CIP	6X	Venezuela					2	2	10.1	-66.6
401431	I. batatas	CIP	6X	Venezuela					2	2	9.4	-67.56
401436	I. batatas	CIP	6X	Venezuela					2	2	10.26	-63.83
401437	I. batatas	CIP	6X	Venezuela					1	2	10.25	-63.8
401445	I. batatas	CIP	6X	Venezuela					1	2	10.08	-63.66
401446	I. batatas	CIP	6X	Venezuela	KC621653			12		2	10.08	-63.66
401451	I. batatas	CIP	6X	Venezuela					1	2	9.86	-63.2
401453	I. batatas	CIP	6X	Venezuela					2	2	10.03	-63.63
401454	I. batatas	CIP	6X	Venezuela					1	2	10.06	-63.63
401455	I. batatas	CIP	6X	Venezuela					2	2	10.16	-63.5
401464	I. batatas	CIP	6X	Venezuela					2	3	ND	ND
401475	I. batatas	CIP	6X	Mexico					1	2	ND	ND
401500	I. batatas	CIP	6X	Venezuela					1	1	12.36	-86.66
401501	I. batatas	CIP	6X	Venezuela					2	3	ND	ND
401525	I. batatas	CIP	6X	Ecuador	KC621654	KC621808	8	12	2	1	12.15	-86.26
401533	I. batatas	CIP	6X	Ecuador					2	1	13.3665	-86.5083
401541	I. batatas	CIP	6X	Dominican Republic					2	2	18.66	-70.75
401551	I. batatas	CIP	6X	Colombia					1	1	14.21	-90.33
401559	I. batatas	CIP	6X	Colombia	KC621655			6	2	3	4.33	-75.61
401560	I. batatas	CIP	6X	Venezuela					1	2	11.1	-63.83
401587	I. batatas	CIP	6X	Guatemala					1	2	15.3	-91.06
420027	I. batatas	CIP	6X	Peru	KC621656			19	1	1	12.08	-85.33
420031	I. batatas	CIP	6X	Peru					1	1	12.76	-85.4
420033	I. batatas	CIP	6X	Peru	KC621657			12	2	1	11.96	-85.56
420053	I. batatas	CIP	6X	Peru					1	1	12.76	-85.4
420056	I. batatas	CIP	6X	Peru					1	1	12.08	-85.33
420079	I. batatas	CIP	6X	Peru					1	1	12.53	-85.76
420213	I. batatas	CIP	6X	Peru					2	1	11.96	-85.56
420304	I. batatas	CIP	6X	Peru					1	1	12.01	-85.16
420309	I. batatas	CIP	6X	Peru					1	1	12.03	-85.16
420324	I. batatas	CIP	6X	Peru	KC621658			20	1	1	12.01	-85.16
420325	I. batatas	CIP	6X	Peru					1	1	12.4667	-84.3833
420332	I. batatas	CIP	6X	Peru					1	1	12.15	-86.26
420350	I. batatas	CIP	6X	Peru					1	1	12.15	-86.26
420361	I. batatas	CIP	6X	Peru					2	2	-11	-78
420368	I. batatas	CIP	6X	Peru					1	1	12.15	-86.26
420414	I. batatas	CIP	6X	Peru					2	1	11.96	-85.56
420607	I. batatas	CIP	6X	Peru					1	1	12.08	-85.33
420634	I. batatas	CIP	6X	Peru					1	2	-3.83	-80.33
420793	I. batatas	CIP	6X	Peru					2	1	11.96	-85.56
420845	I. batatas	CIP	6X	Peru	KC621659			20	1	1	12.76	-85.4
421024	I. batatas	CIP	6X	Peru					1	1	11.88	-86.08
421027	I. batatas	CIP	6X	Peru					1	1	11.43	-85.86
421091	I. batatas	CIP	6X	Peru					1	1	11.43	-85.86
421100	I. batatas	CIP	6X	Peru						1	12.33	-86.45
421128	I. batatas	CIP	6X	Peru	KC621660			20	1	1	12.01	-85.16
441724	I. batatas	CIP	6X	Mexico					2	3	3.46065	-76.5239
460002_1	Ipomoea leucantha	CIP	2X	Ecuador	KC621675			3		5	9.91	-75.33
460002_2	Ipomoea leucantha	CIP	2X	Ecuador	KC621676			3		5	11.25	-73.61
460003_1	Ipomoea leucantha	CIP	2X	Peru	KC621677			8		5	11.5	-72.83
460003_2	Ipomoea leucantha	CIP	2X	Peru	KC621678			8		5	1.16	-78.41
460104_1	Ipomoea leucantha	CIP	2X	Colombia	KC621697	KC621860	38	3		5	11.36	-74.2
460104_2	Ipomoea leucantha	CIP	2X	Colombia	KC621698	KC621858	38	3		5	8.08	-73.16
403248_2	Ipomoea sp.	CIP	4X	Colombia	KC621663			12	2	4	14.51	-91.25
403248_3	Ipomoea sp.	CIP	4X	Colombia	KC621664			12	2	3	9.16	-70.16
403261_1	Ipomoea sp.	CIP	4X	Colombia	KC621665			1		4	14.53	-90.76
403261_2	Ipomoea sp.	CIP	4X	Colombia	KC621666			1		4	14.4166	-90.25
403261_3	Ipomoea sp.	CIP	4X	Colombia	KC621667			12	2	4	ND	ND
403270_1	Ipomoea sp.	CIP	4X	Colombia	KC621668			12	2	4	8.75	-78.46
403270_2	Ipomoea sp.	CIP	4X	Colombia	KC621669			12	2	4	8.13	-78.03
403552_1	Ipomoea sp.	CIP	4X	Ecuador	KC621670			19	1	1	18.8493	-97.0989
403552_2	Ipomoea sp.	CIP	4X	Ecuador	KC621671			19	1	1	18.8493	-97.0989
403959_1	Ipomoea sp.	CIP	4X	Mexico	KC621672			19	1	3	18.8493	-97.0989
403959_2	Ipomoea sp.	CIP	4X	Mexico	KC621673			12	2	3	15.5595	-88.9673
403959_3	Ipomoea sp.	CIP	4X	Mexico	KC621674			20	1	3	19.5443	-96.92
460029_1	Ipomoea sp.	CIP	2X	Ecuador	KC621682			21	1	4	8.8	-78.5
460029_2	Ipomoea sp.	CIP	2X	Ecuador	KC621683			21			-3.33	-79.91
460029_3	Ipomoea sp.	CIP	2X	Ecuador	KC621684			21	1	4	9.16	-70.16
ECAL_2145(1)_1	Ipomoea sp.	NIAS	4X	Guatemala	KC621773			12	2	3	14.6221	-90.5328
ECAL_2156(1)_1	Ipomoea sp.	NIAS	4X	Guatemala	KC621774	KC621814	14	12	2	3	3.66	-76.5
ECAL_2192_2	Ipomoea sp.	NIAS	4X	Guatemala		KC621815	14				15.1153	-89.3614
ECAL_2232(3)_2	Ipomoea sp.	NIAS	4X	Guatemala	KC621775	KC621864	41	12	2	3	0.933797	-79.6674
ECAL_2262_1	Ipomoea sp.	NIAS	4X	Mexico	KC621776			12	2	3	ND	ND
K123_1	Ipomoea sp.	NIAS	6X	Mexico	KC621789			12	2	3	16.91	-92.16
K123_10	Ipomoea sp.	NIAS	6X	Mexico						3	16.91	-92.16
K123_11	Ipomoea sp.	NIAS	6X	Mexico						3	16.91	-92.16
K123_12	Ipomoea sp.	NIAS	6X	Mexico						3	18.8493	-97.0989
K123_14	Ipomoea sp.	NIAS	6X	Mexico						3	18.8493	-97.0989
K123_18	Ipomoea sp.	NIAS	6X	Mexico						3	18.8493	-97.0989
K123_20	Ipomoea sp.	NIAS	6X	Mexico						3	18.8493	-97.0989
K123_4	Ipomoea sp.	NIAS	6X	Mexico						3	18.8493	-97.0989
K123_5	Ipomoea sp.	NIAS	6X	Mexico						3	18.8493	-97.0989
K123_8	Ipomoea sp.	NIAS	6X	Mexico						3	18.8493	-97.0989
K123_9	Ipomoea sp.	NIAS	6X	Mexico						3	18.8493	-97.0989
K177_2	Ipomoea sp.	NIAS	6X	Mexico	KC621791			12	2	3	17.5516	-92.9534
K222_2	Ipomoea sp.	NIAS	3X	Mexico	KC621792			12	2	4	8.58	-71.08
K300_3	Ipomoea sp.	NIAS	4X	Ecuador	KC621794			13			0.933797	-79.6674
K300_5	Ipomoea sp.	NIAS	4X	Ecuador		KC621802	2		NA	3	8.83	-70.5
K300_6	Ipomoea sp.	NIAS	4X	Ecuador	KC621795	KC621816	15	12	2	4	9.08	-78.91
K300_7	Ipomoea sp.	NIAS	4X	Ecuador	KC621796			19	1	1	17.58	-91.25
K500_1	Ipomoea sp.	NIAS	4X	Colombia	KC621797			12	2	4	8.58	-79.96
K500_2	Ipomoea sp.	NIAS	4X	Colombia	KC621798			12	2	4	8.1	-81.03
K500_4	Ipomoea sp.	NIAS	4X	Colombia	KC621799			12	2	4	8.16	-80.43
460824_1	Ipomoea tabasacana	CIP	4X	Mexico	KC621771	KC621865	42	12	2	3	17.58	-91.25
460824_2	Ipomoea tabasacana	CIP	4X	Mexico	KC621772			12	2	3	10.43	-73.2
460070_1	Ipomoea tiliacea	CIP	4X	Mexico	KC621691			3		5	10.5	-73.2
460531_1	Ipomoea tiliacea	CIP	4X	Cuba	KC621754	KC621801	1	13		4	10.43	-73.2
460531_2	Ipomoea tiliacea	CIP	4X	Cuba	KC621755	KC621800	1	13		4	-3.75	-79.91
K134_1	Ipomoea tiliacea	NIAS	4X	Mexico	KC621790			11		4	-3.75	-79.91
K134_2	Ipomoea tiliacea	NIAS	4X	Mexico						4	-8.66	-74.33
K270_1	Ipomoea tiliacea	NIAS	4X	Mexico						4	17.83	-93.33
K270_2	Ipomoea tiliacea	NIAS	4X	Mexico						4	12.01	-85.16
K270_5	Ipomoea tiliacea	NIAS	4X	Mexico						4	12.03	-85.16
K270_8	Ipomoea tiliacea	NIAS	4X	Mexico	KC621793			13		4	-8.66	-74.33
460551_1	Ipomoea trifida	CIP	2X	Cuba		KC621834	22				23	-82.5
460551_2	Ipomoea trifida	CIP	2X	Cuba		KC621825	31				23	-82.5
460266	Ipomoea trifida	CIP	2X	Guatemala	KC621661			9		4	18.66	-89.33
460371	Ipomoea trifida	CIP	2X	Nicaragua	KC621662			9			11.88	-85.95
460021_3	Ipomoea trifida	CIP	2X	Venezuela	KC621681			9		4	-13	-73
460108_1	Ipomoea trifida	CIP	2X	Colombia	KC621699	KC621832	29	9		4	10.5	-73.2
460108_2	Ipomoea trifida	CIP	2X	Colombia	KC621700			9		4	3.41	-76.58
460132_2	Ipomoea trifida	CIP	2X	Colombia	KC621703			9			ND	ND
460137_1	Ipomoea trifida	CIP	2X	Colombia	KC621704			9		4	3.41	-76.58
460137_3	Ipomoea trifida	CIP	2X	Colombia	KC621705			9		4	4.96	-74.58
460262_5	Ipomoea trifida	CIP	2X	Guatemala	KC621706			9		4	18.66	-89.33
460262_6	Ipomoea trifida	CIP	2X	Guatemala	KC621707			15		1	-3.5	-80.5
460262_9	Ipomoea trifida	CIP	2X	Guatemala	KC621708	KC621841	32	9		4	-1.66	-79.5
460274_5	Ipomoea trifida	CIP	2X	Guatemala	KC621709			9		4	-12.58	-69.33
460274_6	Ipomoea trifida	CIP	2X	Guatemala	KC621710			9		4	-12.58	-69.33
460375_7	Ipomoea trifida	CIP	2X	Nicaragua	KC621711			9		4	0.5	-78.16
460378_1	Ipomoea trifida	CIP	2X	Nicaragua	KC621712			9		4	0.5	-78.08
460378_3	Ipomoea trifida	CIP	2X	Nicaragua	KC621713			9		4	-2.16	-78.91
460379_1	Ipomoea trifida	CIP	2X	Nicaragua	KC621714			9		4	-3.33	-79.41
460379_10	Ipomoea trifida	CIP	2X	Nicaragua	KC621715			9		4	-0.16	-76.91
460379_6	Ipomoea trifida	CIP	2X	Nicaragua	KC621716			9		4	-0.16	-76.91
460380_2	Ipomoea trifida	CIP	2X	Nicaragua	KC621717			9		4	-1.46	-78.13
460385_18	Ipomoea trifida	CIP	2X	Nicaragua	KC621718			9		4	-2.33	-79.16
460385_19	Ipomoea trifida	CIP	2X	Nicaragua	KC621719			9		4	14.28	-89.81
460387_2	Ipomoea trifida	CIP	2X	Nicaragua	KC621720			9		4	22.6748	-101.792
460387_3	Ipomoea trifida	CIP	2X	Nicaragua	KC621721			14		4	-9.16	-77.83
460387_4	Ipomoea trifida	CIP	2X	Nicaragua	KC621722			9		4	7.75	-80.71
460388_11	Ipomoea trifida	CIP	2X	Nicaragua	KC621723			9		4	-7.75	-78.16
460388_2	Ipomoea trifida	CIP	2X	Nicaragua	KC621724			9		4	-13	-76.5
460390_10	Ipomoea trifida	CIP	2X	Nicaragua	KC621725			9		4	-14	-76
460390_2	Ipomoea trifida	CIP	2X	Nicaragua	KC621726	KC621826	23	9		4	8.08	-73.05
460403_1	Ipomoea trifida	CIP	2X	Nicaragua	KC621727	KC621838	32	9		4	2.36	-77.66
460403_2	Ipomoea trifida	CIP	2X	Nicaragua	KC621728	KC621840	32	9		4	2.41	-75.86
460403_3	Ipomoea trifida	CIP	2X	Nicaragua	KC621729			9		4	-11.27	-76.81
460406_1	Ipomoea trifida	CIP	2X	Nicaragua	KC621730	KC621824	21	9		4	-18.83	-64.83
460406_19	Ipomoea trifida	CIP	2X	Nicaragua	KC621731	KC621848	32	9		4	-1.66	-79.08
460407_1	Ipomoea trifida	CIP	2X	Nicaragua	KC621732	KC621847	32	9		4	-0.83	-76.5
460407_8	Ipomoea trifida	CIP	2X	Nicaragua	KC621733	KC621821	18	9		4	10.16	-66.66
460408_13	Ipomoea trifida	CIP	2X	Nicaragua	KC621734	KC621830	27	9		4	1.46	-77.58
460408_14	Ipomoea trifida	CIP	2X	Nicaragua	KC621735			9		4	-9.25	-77.83
460408_2	Ipomoea trifida	CIP	2X	Nicaragua	KC621736	KC621817	16	9		4	10.16	-66.66
460410_2	Ipomoea trifida	CIP	2X	Nicaragua	KC621737	KC621818	16	9		5	-12	-77
460410_3	Ipomoea trifida	CIP	2X	Nicaragua	KC621738	KC621833	30	9		4	1.6	-76.91
460410_5	Ipomoea trifida	CIP	2X	Nicaragua	KC621739	KC621849	32	9		4	0.58	-71.5
460410_6	Ipomoea trifida	CIP	2X	Nicaragua	KC621740	KC621831	28	16		4	1.5	-77.33
460411_1	Ipomoea trifida	CIP	2X	Nicaragua	KC621741	KC621842	32	9		5	-15	-75.5
460411_13	Ipomoea trifida	CIP	2X	Nicaragua	KC621742	KC621843	32	9		4	-1.41	-78.41
460424_1	Ipomoea trifida	CIP	2X	Nicaragua	KC621743	KC621852	32	9		4	-3.5	-78.58
460424_13	Ipomoea trifida	CIP	2X	Nicaragua	KC621744	KC621829	26	9		4	1.3	-77.16
460429_1	Ipomoea trifida	CIP	2X	Nicaragua	KC621745	KC621827	24	9		4	1.16	-77.53
460429_2	Ipomoea trifida	CIP	2X	Nicaragua	KC621746	KC621850	32	17		4	-0.66	-78.16
460429_3	Ipomoea trifida	CIP	2X	Nicaragua	KC621747	KC621837	32	9		4	-3.63	-79.75
460431_1	Ipomoea trifida	CIP	2X	Nicaragua	KC621748	KC621835	21	9		4	-17	-65.66
460431_6	Ipomoea trifida	CIP	2X	Nicaragua	KC621749	KC621823	20	9		4	-27.83	-63.66
460431_7	Ipomoea trifida	CIP	2X	Nicaragua	KC621750	KC621844	32	9		4	-3.66	-79.75
460435_11	Ipomoea trifida	CIP	2X	Nicaragua		KC621828	25			4	1.25	-77.25
460736_2	Ipomoea trifida	CIP	2X	Guatemala	KC621762			9		4	10.33	-67.66
460741_1	Ipomoea trifida	CIP	2X	Guatemala	KC621763	KC621851	32	10		4	-2.16	-79.91
460741_10	Ipomoea trifida	CIP	2X	Guatemala	KC621764	KC621839	32	9		4	-1.66	-79.5
460745_3	Ipomoea trifida	CIP	2X	Guatemala	KC621765	KC621836	32	9		4	ND	ND
460745_4	Ipomoea trifida	CIP	2X	Guatemala	KC621766			14		4	10.33	-67.66
460763_10	Ipomoea trifida	CIP	2X	Guatemala	KC621767	KC621846	32	9		4	ND	ND
460763_11	Ipomoea trifida	CIP	2X	Guatemala	KC621768	KC621822	19	7		4	18.46	-69.96
Grif 6197_3	Ipomoea trifida	USDA	2X	Mexico	KC621777			5			16.21	-98.16
Grif 6197_5	Ipomoea trifida	USDA	2X	Mexico	KC621778			9			16.21	-98.16
Grif 6198_6	Ipomoea trifida	USDA	2X	Mexico	KC621779			9			16.1	-93.15
Grif 6204_2	Ipomoea trifida	USDA	2X	Mexico	KC621780			9			ND	ND
Grif 6207_1	Ipomoea trifida	USDA	2X	Mexico	KC621781			4			ND	ND
JA 0100_1	Ipomoea trifida	USDA	2X	Costa Rica	KC621782			9			10.8252	-85.6384
JA 0115_3	Ipomoea trifida	USDA	2X	Costa Rica	KC621783			9			10.4797	-85.08
JA0100_3	Ipomoea trifida	USDA	2X	Costa Rica	KC621784			9		4	4.11	-74.86
JA0100_4	Ipomoea trifida	USDA	2X	Costa Rica	KC621785			9		4	21.75	-80
JA0105_1	Ipomoea trifida	USDA	2X	Costa Rica	KC621786			9		4	18.46	-69.96
JA0105_2	Ipomoea trifida	USDA	2X	Costa Rica	KC621787			2		4	4.11	-74.86
JA0115_2	Ipomoea trifida	USDA	2X	Costa Rica	KC621788	KC621845	32	2		4	4.96	-74.58
460012_1	Ipomoea triloba	CIP	2X	Venezuela	KC621679			3		5	13.264	-61.1943
460012_2	Ipomoea triloba	CIP	2X	Venezuela	KC621680			3		5	14.31	-90.43
460039_1	Ipomoea triloba	CIP	2X	Colombia	KC621685			3		5	-7.7	-79.41
460039_2	Ipomoea triloba	CIP	2X	Colombia	KC621686			3		5	-12	-77
460044_1	Ipomoea triloba	CIP	2X	Colombia	KC621687			3		5	-7.55	-78.5
460044_2	Ipomoea triloba	CIP	2X	Colombia	KC621688			3		5	-10.25	-70.96
460052_1	Ipomoea triloba	CIP	2X	Venezuela	KC621689			3		5	0.933797	-79.6674
460052_2	Ipomoea triloba	CIP	2X	Venezuela	KC621690			3		5	8.36	-81.23
460090_1	Ipomoea triloba	CIP	2X	Dominican Republic	KC621692			3		5	0.86	-79.16
460090_2	Ipomoea triloba	CIP	2X	Dominican Republic	KC621693	KC621853	33	3		5	-26.81	-56.9
460100_1	Ipomoea triloba	CIP	2X	Ecuador	KC621694			3		5	ND	ND
460101_1	Ipomoea triloba	CIP	2X	Colombia	KC621695	KC621804	4	22		4	-14	-76.5
460101_2	Ipomoea triloba	CIP	2X	Colombia	KC621696	KC621805	5	22		4	-15.5	-74.5
460116_1	Ipomoea triloba	CIP	2X	Colombia	KC621701	KC621861	39	3		5	-8.51	-78.8
460116_2	Ipomoea triloba	CIP	2X	Colombia	KC621702	KC621859	38	3		5	-11.18	-74.68
460518_1	Ipomoea triloba	CIP	2X	Ecuador	KC621751	KC621820	17	8		5	8.58	-71.16
460518_2	Ipomoea triloba	CIP	2X	Ecuador	KC621752	KC621819	17	3		5	0.86	-79.16
460526_2	Ipomoea triloba	CIP	2X	Cuba	KC621753	KC621855	35	3		5	-14	-76
460554_1	Ipomoea triloba	CIP	2X	Mexico	KC621756			18		5	-6.33	-76.53
460554_2	Ipomoea triloba	CIP	2X	Mexico	KC621757	KC621803	3	18		5	8.9	-79.73
460558_1	Ipomoea triloba	CIP	2X	Peru	KC621758	KC621856	36	3		5	-4.5	-80
460558_2	Ipomoea triloba	CIP	2X	Peru	KC621759	KC621857	37	3		5	-24.08	-59.16
460658_1	Ipomoea triloba	CIP	2X	Colombia	KC621760			18		5	-6.83	-78.01
460658_2	Ipomoea triloba	CIP	2X	Colombia	KC621761			18		5	-9.5	-77.83
460782_1	Ipomoea triloba	CIP	2X	Ecuador	KC621769	KC621854	34	3		5	21.8819	-78.6438
460782_2	Ipomoea triloba	CIP	2X	Ecuador	KC621770	KC621862	39	3		5	15.05	-90.23
