# Supplementary material for: Disentangling the Origins of Cultivated Sweet Potato (Ipomoea batatas (L.) Lam.)
Source: PLoS One. 2013 May 27;8(5):e62707. doi: 10.1371/journal.pone.0062707 (PMC3664560; doi:10.1371/journal.pone.0062707)
Supplement: Table S2 — Summary of the number of accessions typed for the three kinds of markers (-IGS- chloroplast sequence, -ITS- nuclear sequence and nuclear microsatellites –SSR-) and their geographic origins. For wild Ipomoea species, accessions refer to a population; the number of samples used is indicated between brackets. Accessions from the northern, Caribbean part of Colombia were attributed to the Northern region, while those from southern Colombia were placed in the Southern region (Figure 1). (XLS) [file pone.0062707.s006.xls]

## Sheet: Plan1
Region	Country	I. batatas			I. trifida			I. triloba			Ipomoea sp.			I. tabascana			I. tiliacea			I. leucantha
		IGS	ITS	SSR	IGS	ITS	SSR	IGS	ITS	SSR	IGS	ITS	SSR	IGS	ITS	SSR	IGS	ITS	SSR	IGS	ITS	SSR
Northern	Mexico	1	1	10	4 (5)			1 (2)	1 (1)	1 (2)	6 (7)		5 (17)	1 (2)	1 (1)	1 (2)	3 (3)		3 (7)
	Guatemala	3	2	9	7 (13)	4 (6)	7 (13)				3 (3)	3 (3)	3 (3)
	Nicaragua				18 (41)	11 (24)	18 (42)	1 (1)	1 (2)	1 (1)
	Costa Rica			1	3 (7)		3 (5)
	Panama	2		11
	Jamaica	1		5
	Saint Vincent	1	1	2
	Dominican Republic		9				1 (2)	1 (1)	1 (2)
	Cuba			4		1 (2)											1(2)	1 (2)	1 (2)
	Colombia	3	1	8	3 (5)		2 (4)	1 (2)		1 (2)
	Venezuela	2	1	21	1 (1)		1 (1)	1 (2)	1 (1)	1 (2)
Total Northern		13	6	80	36 (72)	16 (32)	31 (65)	5 (9)	4 (5)	5 (9)	9 (10)	3 (3)	8 (20)	1 (2)	1 (1)	1 (2)	4 (5)	1 (2)	4 (9)
Southern	Ecuador	5	2	20				4 (5)	2 (3)	4 (5)	3 (8)	2 (2)	3 (7)							1(2)		1 (2)
	Peru	5		25				1 (2)	1 (1)	1 (2)										1(2)		1 (2)
	Colombia	1	1	9				4 (8)	2 (4)	4 (8)	5 (10)		4 (10)							1(2)	1(2)	1 (2)
	Bolivia	1		2
	Argentina			1
	Paraguay			2
Total Southern		12	3	59				9 (15)	5 (8)	9 (15)	8 (18)	2 (2)	7 (17)							3 (6)	1 (2)	3 (6)
Total		38	9	139	36 (72)	16 (32)	31(65)	15 (26)	9 (1)	14 (26)	17 (28)	5 (5)	15 (37)	1 (2)	1 (1)	1 (2)	4(5)	1 (2)	4 (9)	3 (6)	1 (2)	3 (6)
